# Supplementary material for: Determination of the kinetics and influence of the mercury ion on papain catalytic activity
Source: Royal Society of Chemistry journal article supplement (doi:10.1039/c5ra12068c), 2015-01-01

## Supplementary material

### Figure captions

Fig. S1. Effect of reaction time on papain activity in casein hydrolysis process

Fig. S2. Lineweaver-Burk reciprocal plot of  $\text{Hg}^{2+}$  modification on papain catalytic activity in casein hydrolysis

Fig. S1.

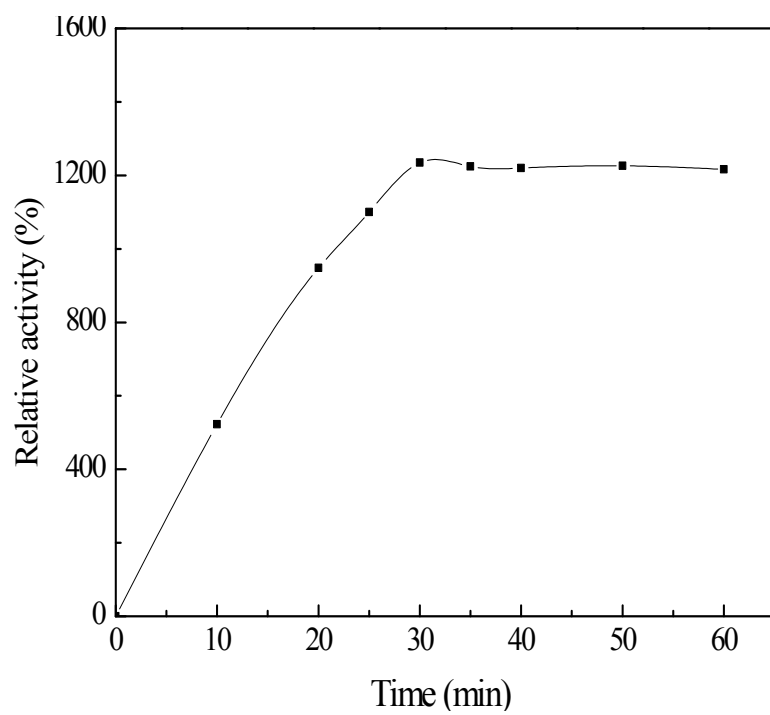

Fig. S2.

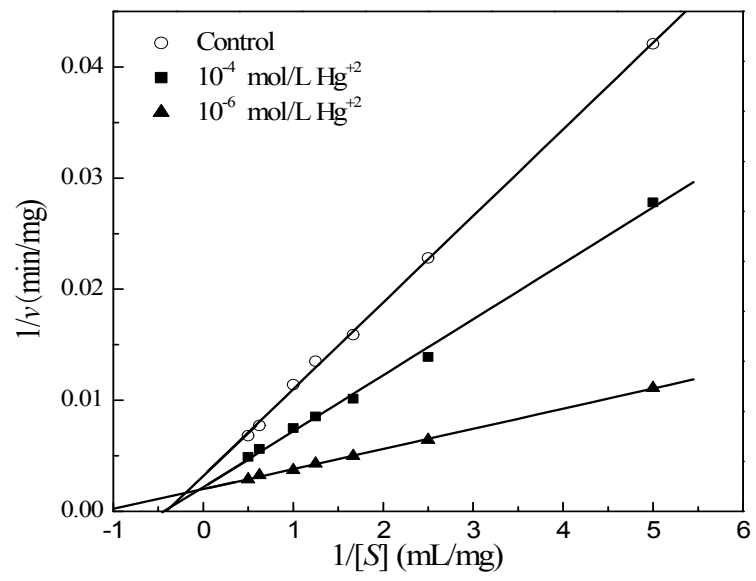

Supplement: c5ra12068c1.pdf [file c5ra12068c1.pdf]
